# Supplementary material for: Multi-faceted quantitative proteomics analysis of histone H2B isoforms and their modifications
Source: PubMed Central journal article supplement (PMC4411797; doi:10.1186/s13072-015-0006-8), 2015-04-22

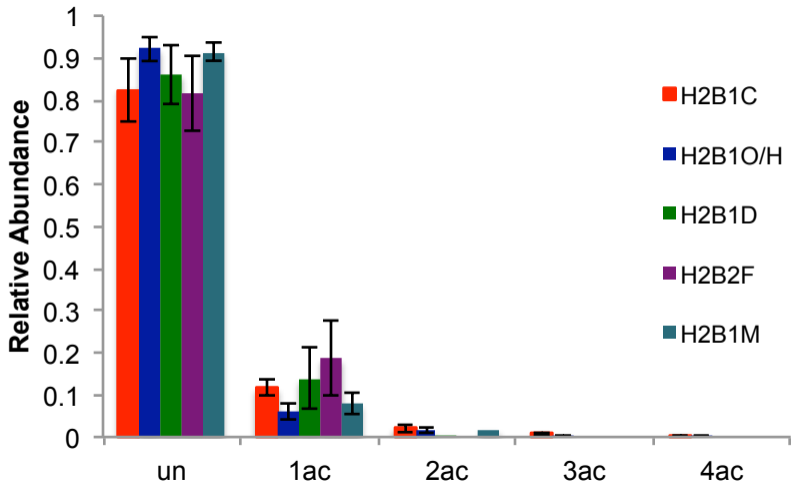

Supplement: 13072_2015_6_MOESM3_ESM.pdf [file 13072_2015_6_MOESM3_ESM.pdf]
